RESEARCH ARTICLE

# Optimizing board structure for ESG integrity: Nonlinear size effects and diversity moderation on greenwashing

Jingzhuo Yu<sup>1,2</sup>, Yong-Sik Hwang<sup>2\*</sup>

**1** School of Civil Engineering and Architecture, Jiaxing Nanhu University, Jiaxing, Zhejiang, China,

**2** School of Business and Economics, Sejong University, Seoul, Republic of Korea

\* [yhwang@sejong.ac.kr](mailto:yhwang@sejong.ac.kr)

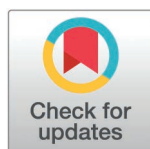

## OPEN ACCESS

**Citation:** Yu J, Hwang Y-S (2026) Optimizing board structure for ESG integrity: Nonlinear size effects and diversity moderation on greenwashing. PLoS One 21(1): e0335803. <https://doi.org/10.1371/journal.pone.0335803>

**Editor:** Juan E. Trinidad-Segovia, University of Almeria: Universidad de Almeria, SPAIN

**Received:** October 14, 2025

**Accepted:** December 24, 2025

**Published:** January 23, 2026

**Copyright:** © 2026 Yu, Hwang. This is an open access article distributed under the terms of the [Creative Commons Attribution License](https://creativecommons.org/licenses/by/4.0/), which permits unrestricted use, distribution, and reproduction in any medium, provided the original author and source are credited.

**Data availability statement:** All relevant data are within the paper and/or its [Supporting Information](#) files.

**Funding:** The author(s) received no specific funding for this work.

**Competing interests:** The authors have declared that no competing interests exist.

## Abstract

This study examines the nonlinear relationship between board size and Environmental, Social, and Governance (ESG) greenwashing and explores how board diversity moderates this association. Using panel data from Chinese A-share listed firms between 2009 and 2023, we employ quadratic fixed-effects regression models to test for an inverted U-shaped relationship. The results indicate that medium-sized boards (10–13 directors) exhibit the highest propensity for greenwashing. Further analyses reveal heterogeneous moderating effects across four dimensions of board diversity—gender, functional background, nationality, and age. Specifically, reaching a critical mass of at least two female directors or increasing functional diversity strengthens the inverted U-shaped relationship, whereas greater age or nationality diversity attenuates it. Drawing on fraud triangle theory, this study uncovers a previously overlooked nonlinear mechanism underlying board size and ESG greenwashing. Moreover, it identifies two distinct diversity-driven pathways: resource-based mechanisms (gender and functional diversity) and supervision-based mechanisms (nationality diversity). These findings extend existing literature on board governance and greenwashing and provide practical insights, suggesting that firms should avoid the “danger zone” associated with medium-sized boards and adopt targeted diversity strategies to mitigate ESG greenwashing risks.

## 1. Introduction

Corporate sustainability reporting has surged worldwide, yet concerns about “greenwashing”—the gap between firms’ environmental rhetoric and reality—are at an all-time high. Fully 85% of institutional investors now view greenwashing as a worsening problem [1]. This paradox is especially evident in China, where regulators have aggressively promoted Environmental, Social and Governance (ESG) disclosure through mandatory reporting requirements for companies in major indices and

those with international listings. In April 2024, China's three major stock exchanges—Shanghai, Shenzhen, and Beijing—jointly implemented ESG Reporting Guidelines, establishing mandatory disclosure requirements for companies listed in prominent indices (SSE 180, STAR 50, SZSE 100, and ChiNext), as well as firms maintaining both domestic and international listings. More than 2,400 Chinese A-share companies released ESG reports in 2024, accounting for approximately 46.09% of all A-share listed firms [2], but officials felt compelled to warn that “ESG reports are not advertisements”—a telling sign that many firms’ sustainability claims may be more cosmetic than substantive [3,4]. Such misrepresentations not only erode stakeholder trust and misallocate capital, but also undermine genuine environmental progress and corporate legitimacy in the long run [5–7].

The urgency of this issue raises the question of how corporate governance can curb ESG greenwashing in practice and in theory. Boards of directors serve as a frontline of oversight, responsible for ensuring truthful disclosure and ethical behavior [8]. Prior research suggests that certain board attributes can restrain greenwashing—for example, more female directors or independent directors tend to engage in less greenwashing [9,10]. However, the influence of board size remains contested and underexplored. Some scholars, drawing on resource dependence theory [11], argue that larger boards possess broader expertise and networks, thereby enhancing oversight and transparency [12]. In contrast, others, based on agency theory [13], emphasize the coordination inefficiencies associated with oversized boards [14]. Empirical findings to date are mixed: one recent study found no clear link between board size and greenwashing [15], while another found a positive relationship between these variables [16], reflecting a broader gap in understanding which board structures truly deter ESG misrepresentation. Notably, prior studies have treated board size effects as linear and direct; few have considered the possibility of a non-linear relationship [17,18]. Furthermore, most existing studies examining the relationship between board characteristics and greenwashing have predominantly focused on gender diversity and board independence, often through the lens of agency theory [19,20]. These studies may emphasize the role of such characteristics in enhancing oversight to curb greenwashing but tend to overlook an equally important function—resource provision [21,22]. Three critical questions therefore remain unanswered:

**RQ1:** Does board size exhibit a non-linear relationship with ESG greenwashing?

**RQ2:** Can the dual mechanisms of oversight and resource provision jointly explain this relationship?

**RQ3:** How do multiple dimensions of board diversity—beyond gender alone—moderate the board size–greenwashing relationship?

To address these questions, the present study integrates fraud triangle theory (FTT) with both agency and resource dependence perspectives, examining how board size relates to greenwashing through opportunity and pressure mechanisms, and how four diversity dimensions (gender, functional background, age, and nationality) condition this relationship.

To achieve the above research objectives, this study analyzes panel data from Chinese listed companies (2009–2023). China is chosen as the research context

due to its unique institutional environment—characterized by underdeveloped ESG disclosure standards, a lack of anti-greenwashing regulations [23–25], a capital market dominated by retail investors with significant information disadvantages [26], and the dual effects of institutional investors on corporate social responsibility (CSR) reports [27]. These factors not only create greater opportunities for greenwashing but also provide a rich empirical setting for examining the complex relationship between board characteristics and ESG greenwashing behavior, thereby revealing governance mechanisms that may be generalizable to other developing economies.

This study contributes to the literature on board governance and greenwashing in at least three ways. First, we advance greenwashing research by moving beyond the prevailing linear, performance-focused perspective to theorize and test a nonlinear relationship between board size and greenwashing. Prior work grounded in agency and resource dependence theories has reported mixed linear associations between board size and ESG/CSR performance—including negative, positive, inverted U-shaped, and insignificant effects—while only a few studies explicitly examine greenwashing [28–30]. Focusing on ESG greenwashing and drawing on FTT, we develop an opportunity–pressure mechanism that predicts, and our evidence confirms, an inverted U-shaped relationship between board size and greenwashing. This finding helps reconcile prior inconsistencies and demonstrates that board size is neither uniformly beneficial nor uniformly harmful, but shapes ESG-related misconduct in a nonlinear way.

Second, we refine and extend research on the nonlinear effects of board size by challenging the notion of a single “optimal” board size. Recent studies, such as Papadopoulou et al. (2025), identify an inverted U-shaped relationship between board size and CSR or sustainability performance and argue that there exists a performance-maximizing size [31]. In contrast, our study reveals an opposite pattern: when ESG greenwashing is the focal outcome, we find an inverted U-shaped relationship, where both relatively small and relatively large boards are associated with lower levels of greenwashing, whereas medium-sized boards exhibit the highest propensity for symbolic ESG disclosure. Thus, instead of a universal optimal size, our results suggest multiple effective board size configurations depending on governance objectives and the trade-off between symbolic and substantive ESG engagement.

Third, this study enriches the board diversity literature from a fine-grained, mechanism-based perspective. Prior research, including recent work by Papadopoulou et al. (2025), typically examines only gender diversity as a moderator of board size effects, leaving other diversity dimensions underexplored [31]. Moreover, most studies focus on the linear main effects of diversity on ESG greenwashing or CSR decoupling, rather than examining how diversity conditions nonlinear governance relationships [32]. In contrast, we decompose board diversity into four dimensions—gender, functional background, age, and nationality—and embed them in an FTT-inspired opportunity–pressure framework. This design allows us to distinguish supervision-based from resource-based mechanisms and to show how each diversity dimension differentially reshapes the board size–greenwashing relationship.

The remainder of this paper is organized as follows: Section 2 reviews the relevant literature and discusses the theoretical foundation of this study. Section 3 presents the research hypotheses. Section 4 introduces the methodological framework. Section 5 presents the empirical results, including the baseline regression analysis, robustness tests, and moderation effect analysis. Finally, Section 6 discusses and analyzes the main conclusions, highlights their theoretical and practical implications, and points out the limitations of the study.

## 2 Literature review

### 2.1 Greenwashing

The concept of greenwashing has evolved from product-level deceptive environmental claims [33], to CSR decoupling [34], and more recently to applications within the ESG framework [35]. At the firm level, ESG greenwashing is typically understood as a systematic discrepancy between symbolic disclosure and substantive performance [36]. Companies engaging in greenwashing strategically manipulate ESG information to project an inflated image of environmental and social responsibility while obscuring weak underlying performance [37–39]. This “words-versus-actions” gap represents a

form of strategic decoupling, whereby firms invest disproportionately in ESG communication and disclosure activities relative to their actual ESG implementation efforts [10]. Consistent with this view, ESG greenwashing is usually measured as the gap between an ESG disclosure score and an ESG performance rating [24]. Disclosure scores, such as Bloomberg's ESG disclosure score, primarily capture the extent and intensity of publicly reported ESG information, whereas performance ratings, such as Huazheng's ESG performance rating, reflect underlying ESG outcomes and practices. A larger positive gap therefore indicates greater reliance on symbolic ESG disclosure relative to substantive performance—i.e., more severe greenwashing—whereas negative values may signal “greenhushing,” where firms disclose conservatively despite relatively strong ESG performance [40].

## 2.2 Fraud triangle theory

Greenwashing can be conceptualized as a form of fraudulent behavior in corporate information disclosure, due to its structural similarities with fraud [41]. Consequently, FTT, which identifies three core motivations behind fraud—pressure, opportunity, and rationalization—offers a valuable analytical framework for exploring ESG greenwashing [42]. Pressure in this context typically manifests as legitimacy pressure, driven by the need to fulfill stakeholder expectations or regulatory demands [43]. Firms with poor ESG performance face heightened legitimacy risks, which motivate them to alleviate stakeholder concerns by exaggerating or fabricating ESG achievements, thus transforming disclosure from a legitimizing tool into a greenwashing tactic [44,45]. Opportunity relates to the likelihood of engaging in greenwashing without detection, facilitated by information asymmetry and weak supervision [46]. One of the most classic examples of creating opportunity through information asymmetry is by reducing the readability of ESG reports, to obscure negative details and diminish stakeholder responsiveness [47]. Weak oversight from internal governance structures or external monitors such as institutional investors, analysts, auditors, and media further creates greenwashing opportunities [48]. Finally, rationalization involves internally justifying unethical actions by framing them as legitimate strategies [49]. For example, the greenwashing “herding effect” triggered by regional isomorphism [50] may be rationalized by firms as a “common survival strategy within the industry.” This cognitive justification reduces ethical discomfort and fosters an environment where misleading ESG disclosures become psychologically acceptable. Recent studies successfully apply the FTT to greenwashing research [51,52].

## 2.3 Board size

Board size has a significant impact on governance effectiveness [53], yet existing research offers two conflicting perspectives. From an agency theory perspective, smaller boards enhance governance efficiency and oversight because they facilitate closer collaboration, clearer accountability, and more effective monitoring of management [13]. By contrast, larger boards are more prone to bureaucracy, coordination difficulties, and reduced cohesion, which can lower efficiency and weaken monitoring [54], thereby creating conditions conducive to greenwashing. Empirical evidence supports these adverse effects, documenting a negative association between board size and ESG performance [30], a negative association with governance performance [29], and a positive association with ESG greenwashing [16].

Resource dependence theory, however, emphasizes the advantages of larger boards, including broader expertise, greater access to critical resources, and richer stakeholder networks [11]. These attributes enable boards to respond more effectively to diverse stakeholder demands, strengthen ethical practices, improve ESG or CSR performance, and reduce legitimacy pressures, thereby lowering incentives to engage in greenwashing. Empirical studies show that firms with larger boards tend to exhibit higher ESG performance [55,56], better CSR performance [28], improved long-term environmental performance [57], fewer ESG controversies [58,59], and stronger ethical business practices [60].

Several nuanced patterns further complicate this debate. Some evidence suggests that the effect of board size is context-dependent: in China, board size is positively associated with CSR performance, whereas in India and South Africa it is negatively associated [61]. Other work documents an inverted U-shaped relationship between board size and ESG/

CSR performance [31,62]. Finally, some studies report no significant linear relationship between board size and ESG performance [29] or between board size and greenwashing [15].

Notably, among these studies, only Gidage et al. and Keresztúri et al. explicitly examine ESG greenwashing [15,16], while Agnese et al. and Treepongkaruna et al. focus on ESG controversies [58,59]. The remaining studies investigate overall ESG or CSR performance rather than misconduct or disclosure-performance gaps. Consequently, while prior research emphasizes linear relationships between board size and ESG/CSR outcomes, few studies directly address greenwashing, and virtually none theorize or test non-linear effects. Our study addresses this gap by explicitly focusing on ESG greenwashing and developing a non-linear board-size mechanism grounded in FTT.

## 2.4 Diversity

Diversity can be categorized into relational-oriented dimensions (including “surface-level” differences such as gender, race, and age) and task-oriented dimensions (including “deep-level” or job-related differences such as tenure and expertise) [63]. This study examines four dimensions—gender, functional background, nationality, and age—covering these diversity types. Boards primarily serve supervisory and advisory roles [21]. From a supervisory standpoint, diversity promotes critical thinking, reduces groupthink, enhances independence, and enriches oversight [64]. However, excessive diversity may cause factionalism (“Faultline” effect), reduce cohesion, and increase conflicts, weakening supervision [65,66]. From an advisory perspective, diverse boards offer extensive expertise and external networks, enhancing responsiveness to stakeholders and improving ESG and CSR outcomes [67,68]. Conversely, social identity theory suggests diversity can negatively impact performance due to higher internal conflicts, coordination costs, and reduced consensus [69,70]. In summary, board diversity represents a “double-edged sword” [71], with its effects varying based on supervisory and advisory contexts [72]. Additionally, impacts differ according to environmental conditions, institutional contexts, and diversity definitions, highlighting the need for focused, context-specific research [73,74].

## 3 Hypotheses development

### 3.1 Board size and ESG greenwashing

The theoretical model framework is shown in Fig 1. Building on FTT, ESG greenwashing can be understood as resulting from three primary psychological and structural drivers: opportunity, pressure, and rationalization [75]. While “rationalization” is often treated as relatively stable and implicit [48], “opportunity” and “pressure” can vary substantially across firms depending on factors such as board structure. Drawing upon Haans et al. (2016), an inverted U-shaped relationship may emerge when two underlying linear mechanisms—one positive and one negative—interact multiplicatively [76]. This approach is particularly applicable when an outcome, typically a strategic choice such as greenwashing, is influenced simultaneously by two opposing forces [76]. They illustrate this concept through examples such as Ang (2008), who found that corporate collaboration is most frequent at moderate levels of competitive intensity [77]. Specifically, Ang (2008) identified an inverted U-shaped relationship between competitive intensity and collaboration [77], constructed by multiplying a negative linear function (decreasing opportunity for collaboration with increasing competitive intensity) and a positive linear function (increasing motivation for collaboration with increasing competitive intensity).

Applying this theoretical framework to ESG greenwashing, we propose that board size simultaneously influences the opportunity and pressure dimensions. As board size grows, the potential for greenwashing may increase due to weakened oversight capabilities, heightened information asymmetry, and coordination inefficiencies [53]. On the other hand, larger boards typically offer broader expertise and more extensive external networks, enabling firms to enhance their stakeholder management capabilities and achieve substantive improvements in ESG practices, thus potentially alleviating legitimacy pressures [78].

Consequently, corporate greenwashing behaviors can be considered the result of an interplay between opportunity and pressure. Small boards may experience higher legitimacy pressure due to limited resources and weaker genuine ESG



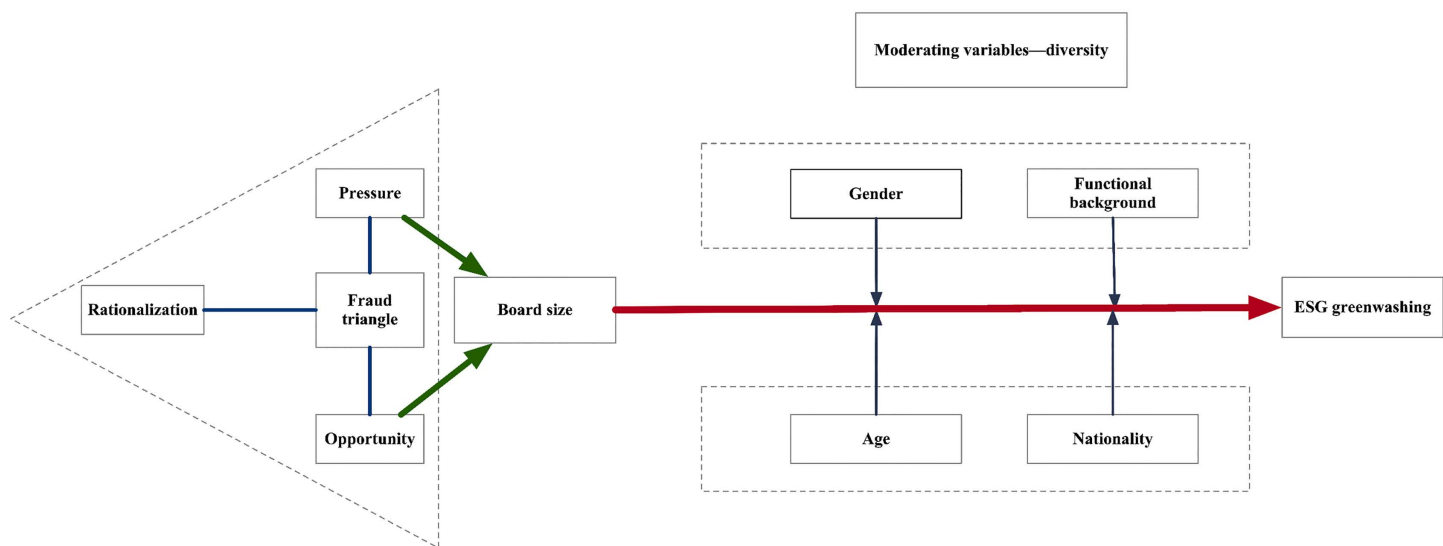

**Fig 1. Theoretical model framework.**

<https://doi.org/10.1371/journal.pone.0335803.g001>

capabilities, though their oversight strength reduces management’s greenwashing opportunities [79]. In contrast, larger boards may provide more opportunities for greenwashing due to diluted oversight but have access to resources that can facilitate genuine ESG improvements and thus mitigate legitimacy pressures [20]. Hence, moderately-sized boards experience intermediate levels of both opportunity and pressure. The interplay between these two factors—opportunity  $\times$  pressure—likely peaks when both elements are moderate, creating conditions for the highest risk of ESG greenwashing. This interaction aligns with the “Type 3” interaction structure outlined by Haans et al. (2016) [76], where positive and negative linear relationships interact to produce an inverted U-shaped effect. This conceptualization is visually depicted in Panel A of Fig 2 and informs the following hypothesis:

H1: There is an inverted U-shaped relationship between board size and ESG greenwashing.

### 3.2 The moderating effect of diversity

We suggest that the inverted U-shaped relationship between board size and ESG greenwashing may arise from the interaction between opportunity and pressure factors. Board diversity may moderate this relationship by affecting how rapidly opportunities increase and pressures decrease as board size expands. We identify four possible moderation mechanisms: (i) both opportunity and pressure changes accelerate; (ii) opportunity increases accelerate while pressure decreases decelerate; (iii) opportunity increases decelerate while pressure decreases accelerate; and (iv) both opportunity and pressure changes decelerate. Mechanism (i) potentially steepens the inverted U-shaped curve (as shown in Panel B of Fig 2), whereas mechanism (iv) flattens it (Panel C of Fig 2). For mechanisms (ii) and (iii), outcomes may depend on the dominant effect between opportunity and pressure. In the following sections, we explore the moderating effects of diversity along four dimensions: gender, functional background, nationality, and age.

**3.2.1 Gender diversity.** From the perspective of FTT, gender diversity can mitigate both pressure and opportunity for greenwashing, but through partly distinct mechanisms. Drawing on gender role theory, female directors are often socialized into more communal and prosocial roles than men, emphasizing care, empathy, and relationship building [80,81]. On boards, this tends to heighten sensitivity to the “Social” pillar of ESG (e.g., employee welfare, community relations, stakeholder inclusion) and to fairness, transparency, and procedural justice within the “Governance” pillar [82].

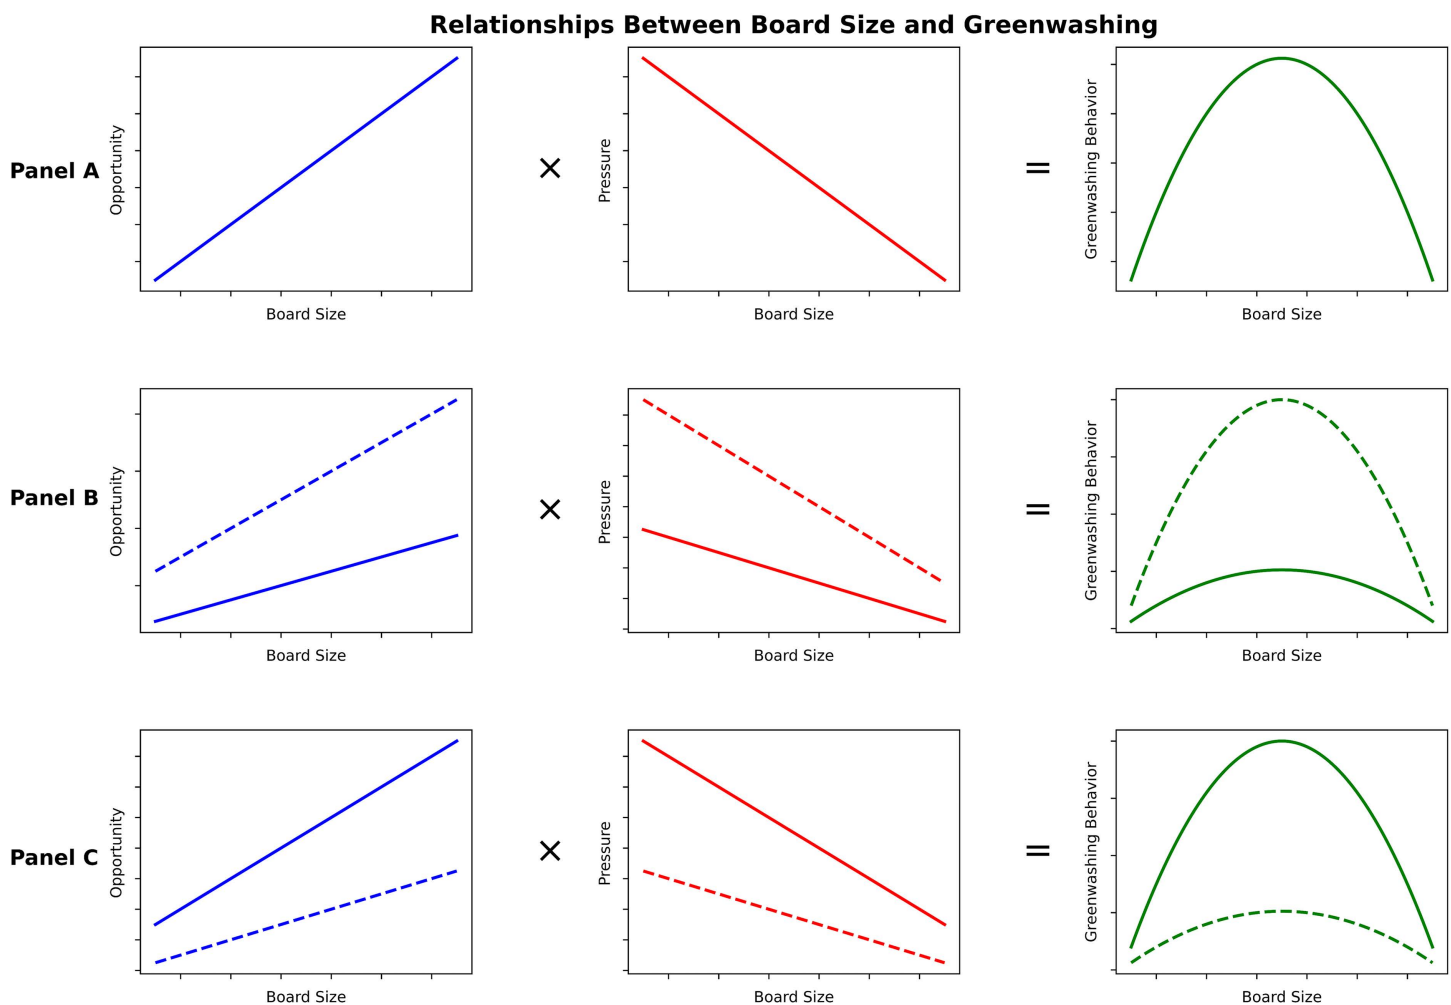

**Fig 2. Latent mechanism of the inverted U-shaped relationship.** Note: Solid lines indicate the pre-change state; dashed lines indicate the post-change state.

<https://doi.org/10.1371/journal.pone.0335803.g002>

These role-consistent traits enrich the board's relational and reputational resources—such as trust with employees, communities, and NGOs—and enhance its capacity to anticipate and address social and environmental concerns [83].

From a gender equity perspective, greater female representation also signals a commitment to equality and inclusion that is increasingly expected by regulators, investors, and civil society. Gender-diverse boards are therefore more likely to be perceived as legitimate and socially responsible, which can reduce external legitimacy pressures that might otherwise induce symbolic ESG communication and greenwashing [84]. By aligning board composition with societal and stakeholder expectations, gender diversity can pre-empt reputational criticism related to both diversity and ESG conduct, thereby easing pressure to resort to impression management. In this way, female directors play a resource-provision role by bringing distinct perspectives, stakeholder-oriented values, and legitimacy-enhancing signals that help boards manage ESG-related pressures more effectively.

Gender diversity also affects the opportunity side of greenwashing. Prior research shows that female directors tend to exhibit higher diligence, ethical sensitivity, and risk aversion, and are more likely to challenge questionable managerial behavior [85,86]. Their presence can strengthen monitoring intensity, improve the quality of board deliberations, and limit

managers' ability to exploit information asymmetries to misrepresent ESG performance [87,88]. Thus, gender-diverse boards function as a governance mechanism that constrains opportunities for misleading ESG disclosures and opportunistic greenwashing.

Overall, gender diversity may exert dual effects on the inverted U-shaped relationship between board size and greenwashing. First, female directors expand the board's resource base—particularly stakeholder insight and reputational capital—thereby steepening the inverted U-shaped curve. Second, by enhancing oversight and ethical scrutiny, gender diversity may dampen greenwashing opportunities in larger boards, flattening the relationship. This represents a type (iii) among the four moderation mechanism combinations. While female directors' resource-provision function may be salient under strong legitimacy pressures, their monitoring function is equally important. Theory does not clearly predict which mechanism will dominate *ex ante*. Thus, we propose a non-directional hypothesis:

H2. Gender diversity moderates the inverted U-shaped relationship.

**3.2.2 Functional background diversity.** Functional background diversity may also help mitigate the two critical elements of the fraud triangle: pressure and opportunity. In terms of pressure, boards with functional diversity contribute specialized knowledge, skills, and external networks [89], and demonstrate stronger capabilities in identifying and responding to various social and environmental challenges [28]. This enables them to better understand and coordinate the interests of diverse stakeholders [90], thereby enhancing stakeholder management and promoting more proactive ESG actions [91], which effectively alleviates the legitimacy pressures that often drive greenwashing behavior. Regarding opportunity, functional diversity creates a “collective intelligence” effect that improves board oversight and reduces the risk of managerial manipulation through information asymmetry [63,92], thus limiting opportunities for misleading ESG disclosures.

Therefore, we posit that functional diversity may simultaneously exert dual effects: on the one hand, by providing a richer pool of resources and knowledge, they can accelerate the alleviation of external legitimacy pressures, which may amplify the inverted U-shaped relationship between board size and greenwashing [93]; on the other hand, they may enhance oversight by addressing managerial blind spots, thereby reducing greenwashing opportunities and weakening this inverted U-shaped relationship [94]. Therefore, this pattern also falls under type (iii). Since we are unable to predict which mechanism will dominate, we propose a non-directional hypothesis:

H3. Functional background diversity moderates the inverted U-shaped relationship.

**3.2.3 Nationality diversity.** Foreign directors also help mitigate two elements of the fraud triangle: opportunity and pressure. Regarding opportunity, as outsiders to the firm, foreign directors maintain a higher degree of independence from senior management [95]. They can transcend the cultural influences prevalent in China—such as *guanxi* (personal connections), *renqing* (favor), and *mianzi* (face)—and maintain a more objective stance [96]. This enables them to oversee management more impartially and strengthens the board's ability to prevent controlling shareholders or executives from exploiting governance loopholes [97]. Their reputational capital enhances board accountability, and their professional expertise supports more rational judgment, thereby improving detection capabilities and further reinforcing oversight effectiveness [98]. As a result, the likelihood of greenwashing is directly reduced.

In terms of pressure, foreign directors bring diverse perspectives and professional experience [99]. They introduce ethical standards and advanced governance practices from mature systems into Chinese firms, thereby reinforcing corporate governance structures [100] and encouraging broader consideration of social and environmental issues in board decision-making [101]. This diversity facilitates more comprehensive stakeholder evaluation and fosters more balanced decision-making processes [85]. Empirical evidence confirms that greater representation of foreign directors enhances ESG or CSR performance [102,103], effectively easing legitimacy pressures.

Therefore, foreign directors may exert two simultaneous effects. On the one hand, by providing professional expertise, external resources, and extensive social networks, foreign directors may help firms better engage with external



stakeholders and more effectively alleviate legitimacy pressures [104,105]. This effect may accelerate the reduction of greenwashing motivation associated with increasing board size, thereby steepening the inverted U-shaped relationship between board size and greenwashing. On the other hand, due to their relatively independent status and stronger willingness to exercise oversight, foreign directors may significantly enhance the board's monitoring function and reduce managerial opportunities for greenwashing [106]. This may slow the weakening of oversight caused by an expanding board, thus flattening the inverted U-shaped relationship. Therefore, this mechanism also falls under type (iii) among the four moderation mechanism combinations. Given the current uncertainty regarding which of the two effects is more dominant, we propose the following non-directional hypothesis:

H4: Nationality diversity moderates the inverted U-shaped relationship.

**3.2.4 Age diversity.** Age diversity mitigates the opportunity component of the fraud triangle but increases pressure. Concerning opportunity, age-homogeneous boards facilitate cognitive convergence as directors with shared historical experiences develop similar perspectives, fostering groupthink [107] and creating opportunities for unchallenged, questionable ESG claims. Conversely, age-diverse boards enhance critical thinking and monitoring effectiveness [108], reducing management's opportunities for greenwashing practices.

However, the intergenerational conflict resulting from this diversity may lead to disagreements and undermine team cohesion [109]. Empirical studies by Hafsi and Turgut (2013) [110] and Wu et al. (2024) [68] document that such decreased cohesion can diminish ESG performance, consequently increasing external legitimacy pressure on the organization.

Therefore, age diversity may have two distinct effects. On the one hand, age diversity can enhance board oversight by avoiding groupthink, potentially mitigating the oversight weaknesses associated with larger boards and thus reducing opportunities for ESG greenwashing [111]. On the other hand, differences in values and decision-making styles across various age groups may lead to communication and coordination challenges, potentially limiting the board's ability to swiftly and effectively respond to stakeholder demands, thereby slowing the alleviation of legitimacy pressures [112]. Consequently, this combination aligns with type (iv) among the four moderation mechanism combinations. These two effects collectively flatten the inverted U-shaped relationship between board size and greenwashing behavior. Therefore, we propose the following hypothesis:

H5: Age diversity moderates the inverted U-shaped, making it flatter.

## 4 Research design

### 4.1 Selection of sample

This study investigates A-share listed companies from 2009 to 2023, using two distinct ESG metrics. First, the Bloomberg ESG disclosure score ( $ESG_{dis}$ ) was applied to assess the extent of ESG disclosure by firms [113]. This indicator quantifies the amount of disclosed ESG-related content, both positive and negative, on a scale from 0 to 100, but does not directly reflect actual ESG performance [39]. Second, the Huazheng ESG score was utilized to evaluate genuine ESG performance ( $ESG_{per}$ ), focusing specifically on the implementation and effectiveness of corporate ESG initiatives within China's unique institutional and market environment [114,115]. The Huazheng score is particularly advantageous for the Chinese context due to its comprehensive coverage, timely updates, and detailed ESG indicators [116].

As Huazheng ESG data became available in 2009 and Bloomberg has not yet released 2024 ESG disclosure scores for most listed companies, the study period spans December 31, 2009, to December 31, 2023. Firm-level data were sourced from the China Stock Market and Accounting Research database. Financial firms, observations with missing key variables, "ST" or "\*ST" designated companies, and companies listed for under one year were excluded [117]. All continuous variables were winsorized at the 1% level to limit the impact of outliers. The final dataset includes 13,037 observations across 1,453 listed companies.

## 4.2 Variables measurements

ESG greenwashing (*GW*), our dependent variable, quantifies the divergence between a firm's ESG disclosures and actual ESG performance [24]. Higher *GW* values indicate greater potential greenwashing activity, reflecting either inflated ESG disclosures relative to performance or diminished performance relative to disclosures [36]. Conversely, *GW* reduction occurs through either moderated disclosure claims or enhanced substantive performance [118]. This conceptualization suggests two fundamental pathways for mitigating greenwashing: implementing supervisory mechanisms to control exaggerated ESG disclosures [10] and establishing responsibility-fulfillment mechanisms to enhance genuine ESG performance in response to legitimacy demands [3]. For measurement consistency, both  $ESG_{dis}$  and  $ESG_{per}$  were standardized using their respective means ( $\overline{ESG_{dis}}$  and  $\overline{ESG_{per}}$ ) and standard deviations ( $\sigma_{dis}$  and  $\sigma_{per}$ ), with the Equation (1) as follows:

$$GW_{i,t} = \frac{ESG_{dis\ i,t} - \overline{ESG_{dis}}}{\sigma_{dis}} - \frac{ESG_{per\ i,t} - \overline{ESG_{per}}}{\sigma_{per}} \quad (1)$$

Board size (*Bsize*) constitutes our independent variable, measured as the total number of directors (executive, non-executive, and independent) reported in annual corporate disclosures [53,94]. Four dimensions of diversity serve as moderating variables in our analysis: gender, functional background, nationality, and age [96,110,119,120]. These dimensions are examined for their moderating effects on the board size-greenwashing relationship. Table A1 in Appendix A in [S1 File](#) presents variable nomenclature, symbols, and measurement specifications.

This study employed several control variables. Corporate governance controls included board meeting frequency (*Meeting*), which strengthens oversight [121], increases transparency, and reduces agency costs [29,122]; CEO duality (*Dual*), where the CEO also chairs the board, potentially weakening checks and balances [123]; and management shareholding ratio (*Mshare*), with higher ratios reducing agency costs, promoting long-term orientation, and diminishing opportunistic behavior [120]. Financial indicators comprised return on assets (*ROA*), as more profitable firms typically demonstrate superior ESG performance and less motivation for greenwashing [9,124], and cash flow ratio (*Cashflow*), since greater financial resources often correlate with better CSR practices [125]. Firm-level characteristics included firm age (*FirmAge*), with established firms typically exhibiting superior ESG disclosure and performance compared to younger counterparts [126], and State-Owned Enterprise status (*SOE*), as private firms face fewer environmental regulations and thus demonstrate greater propensity for greenwashing [24].

## 4.3 Empirical model

In this study, we examined the board size-greenwashing relationship using ordinary least squares regression with a two-way fixed-effects model (year and firm) to analyze our panel data [8]. This approach mitigated potential estimation bias from omitted variables, unobservable firm-specific characteristics, and temporal trends, strengthening causal inferences. We implemented firm-clustered standard errors to account for potential correlations in firm-level error terms, enhancing the robustness of our findings [127]. Our hypotheses were tested using the following model:

$$GW_{i,t} = \alpha_0 + \alpha_1 Bsize_{i,t} + \alpha_2 Bsize_{i,t}^2 + \alpha_3 Controls_{i,t} + \varepsilon_{i,t} \quad (2)$$

where *i* and *t* represent firm and year, respectively; *Bsize* is the explanatory variable, *Bsize*<sup>2</sup> is its quadratic form; *GW* is the dependent variable; *Controls* are the control variables; and  $\varepsilon$  is the random disturbance term. Equation (2) is used to test the inverted U-shaped relationship between board size and greenwashing (H1).

Building on Equation (2), we introduced moderating variables and their interaction terms, and constructed Equation (3) as follows:

$$GW_{i,t} = \beta_0 + \beta_1 Bsize_{i,t} + \beta_2 Bsize_{i,t}^2 + \beta_3 Diversity_{i,t} + \beta_4 Diversity_{i,t} \times Bsize_{i,t} + \beta_5 Diversity_{i,t} \times Bsize_{i,t}^2 + \beta_6 Controls_{i,t} + \varepsilon_{i,t} \quad (3)$$

Where *Diversity* represents four moderating variables: *Female*, *Funback*, *Nationality* and *Age*. These variables are used to examine the moderating effects of different board diversity dimensions on the relationship between board size and greenwashing, corresponding to the tests of H2 through H5.

## 5 Empirical analysis

### 5.1 Descriptive statistics and bivariate analysis

[Table 1](#) presents descriptive statistics for all variables. *GW* exhibited a mean of  $-0.327$ , with a standard deviation (SD) of  $1.214$ . Values ranged from  $-2.862$  to  $2.723$ , with a median of  $-0.348$ . These metrics indicate moderate greenwashing practices among Chinese enterprises, with substantial variation across firms, consistent with previous findings [120]. *Bsize* ranged from 4 to 18 directors, with a mean of  $9.017$  (SD =  $1.871$ ), reflecting moderate variation in governance structures across sample firms. Table A2 in [S1 File](#) displays correlation coefficients and variance inflation factors (VIF) for all variables. VIF values ranged from  $1.032$  to  $1.571$ , substantially below the conventional threshold of 10 [128], indicating that multicollinearity does not significantly affect our analysis.

### 5.2 Regression results

We first conducted a Hausman test, with p-values equal to 0, demonstrating that the fixed-effects model is more appropriate than the random-effects model [129]. Subsequently, we tested the nonlinear relationship between board size and greenwashing, with the results reported in Column 1 of [Table 2](#). The results show that the coefficient of *Bsize* is significantly positive, while the coefficient of *Bsize*<sup>2</sup> is significantly negative, indicating a clear inverted U-shaped relationship between *Bsize* and *GW*, thus supporting H1. The estimated turning point of board size is 11.2 directors, lying within the observed range (4–18), suggesting a meaningful nonlinear relationship. At the 25th percentile of board size (8 directors), adding one director is associated with a 0.36-point increase in greenwashing, whereas at the 75th percentile (9 directors), the same increase leads to a 0.25-point decrease.

Next, we employed two methods to address endogeneity issues. First, we employ the two-step system generalized method of moments (GMM), incorporating lagged values of the dependent variable (*L.GW*) into the regression equation to

**Table 1. Descriptive statistics.**

| Symbol      | Observations | Mean   | SD     | Min.   | Median | Max    |
|-------------|--------------|--------|--------|--------|--------|--------|
| GW          | 13037        | −0.327 | 1.214  | −2.862 | −0.348 | 2.723  |
| Bsize       | 13037        | 9.017  | 1.871  | 4.000  | 9.000  | 18.000 |
| Female      | 13037        | 0.135  | 0.124  | 0.000  | 0.111  | 0.556  |
| Funback     | 13037        | 1.541  | 0.426  | 0.530  | 1.554  | 2.477  |
| Nationality | 13037        | 0.344  | 0.266  | 0.000  | 0.286  | 1.000  |
| Age         | 13037        | 0.142  | 0.046  | 0.052  | 0.137  | 0.282  |
| Meeting     | 13037        | 10.308 | 4.723  | 1.000  | 9.000  | 58.000 |
| Dual        | 13037        | 0.210  | 0.407  | 0.000  | 0.000  | 1.000  |
| Mshare      | 13037        | 6.303  | 13.591 | 0.000  | 0.033  | 61.512 |
| FirmAge     | 13037        | 2.906  | 0.352  | 1.792  | 2.944  | 3.526  |
| SOE         | 13037        | 0.526  | 0.499  | 0.000  | 1.000  | 1.000  |
| ROA         | 13037        | 0.046  | 0.058  | −0.169 | 0.040  | 0.220  |
| Cashflow    | 13037        | 0.062  | 0.069  | −0.131 | 0.058  | 0.264  |

<https://doi.org/10.1371/journal.pone.0335803.t001>

**Table 2. Main regression results.**

|                     | 1                   | 2                    | 3                   |
|---------------------|---------------------|----------------------|---------------------|
| Symbol              | Baseline            | GMM                  | PSM                 |
| Bsize               | 0.125**<br>(2.57)   | 0.498**<br>(2.31)    | 0.121**<br>(2.43)   |
| Bsize2              | −0.006**<br>(−2.36) | −0.021**<br>(−2.27)  | −0.005**<br>(−2.24) |
| Meeting             | 0.008***<br>(2.94)  | 0.014***<br>(2.78)   | 0.008***<br>(2.88)  |
| Dual                | 0.042<br>(1.11)     | 3.496*<br>(1.85)     | 0.037<br>(0.97)     |
| Mshare              | 0.002<br>(0.64)     | 0.004<br>(0.38)      | 0.001<br>(0.25)     |
| FirmAge             | −0.097<br>(−0.53)   | 0.201<br>(1.41)      | −0.174<br>(−0.92)   |
| SOE                 | −0.057<br>(−0.78)   | 0.813**<br>(2.22)    | −0.053<br>(−0.68)   |
| ROA                 | −0.345<br>(−1.34)   | −4.463***<br>(−4.07) | −0.276<br>(−1.01)   |
| Cashflow            | 0.659***<br>(4.28)  | 6.491***<br>(3.54)   | 0.589***<br>(3.50)  |
| L.GW                |                     | 0.499***<br>(16.23)  |                     |
| Constant            | −0.802<br>(−1.37)   | −5.411***<br>(−3.11) | −0.494<br>(−0.81)   |
| Year                | Yes                 | Yes                  | Yes                 |
| Firm                | Yes                 | Yes                  | Yes                 |
| AR (1) p-value      |                     | 0.000                |                     |
| AR (2) p-value      |                     | 0.760                |                     |
| Hansen test p-value |                     | 0.181                |                     |
| Observations        | 12,999              | 11,039               | 11,134              |
| R-squared           | 0.653               |                      | 0.653               |

Robust t-statistics in parentheses.

\*\*\* p<0.01, \*\* p<0.05, \* p<0.1.

<https://doi.org/10.1371/journal.pone.0335803.t002>

capture potential dynamic effects, and using appropriate instrumental variables (typically lagged values of independent or control variables) to effectively address reverse causality and potential endogeneity issues [130]. The results in Column 2 of Table 2 confirm the robustness of our GMM model, with a significant AR (1) p-value and non-significant AR (2) and Hansen test p-values. Importantly, the GMM regression results align with the baseline regression results. Second, to address the endogeneity due to sample selection bias, we employed propensity score matching (PSM). Drawing on Shen et al. (2025) [131], we classify firms as treated if their board sizes are at or above the median. For each treated observation, we select its five nearest neighbors from the pool of untreated firms, using all control variables as matching covariates. As a result, the treatment and control groups are comparable across all observable characteristics, except for board size. The matching procedure yields 7,223 treated and 3,969 control observations. The maximum standardized bias among the covariates is 1.5%, well below the recommended 5% threshold [132], indicating satisfactory balance. Table A3 in S1 File

reports the balance statistics, confirming that PSM effectively mitigates pre-matching group differences. Table A4 in [S1 File](#) presents the average treatment effect on the treated (ATT). Before matching, the difference in greenwashing between the two groups is  $-0.066$ ; after matching, it reverses to  $0.114$  and becomes statistically significant ( $t\text{-value} > 2.56$ ). Re-estimating the baseline regression on the matched sample ([Table 2](#), column 3) produces results consistent with the full-sample analysis, reinforcing the conclusion that board size and greenwashing exhibit an inverted U-shaped relationship.

### 5.3 Robustness test

This study employed multiple robustness tests. First, we addressed the possibility of pseudo inverted U-shape relationships using the U test [[133](#)]. As shown in Panel A of [Table 3](#), the extreme point (11.2) falls within the observed board size range (4, 18) and is statistically significant ( $p = 0.0255$ ), confirming the inverted U-shaped relationship.

Second, we tested for S-shaped relationships by adding a cubic term to our regression [[76](#)]. As shown in Panel B, Column 1 of [Table 3](#), the cubic term ( $Bsize^3$ ) is not significant, excluding S-shaped relationships and further supporting the inverted U-shape finding.

Third, we employ two alternative measures of greenwashing. First, to capture more precisely the extent of greenwashing relative to an industry benchmark, we depart from the baseline approach of full-sample standardization. Instead, we

**Table 3. Robustness test results.**

| Panel A: U-test regression result |                   |                     |                     |                     |
|-----------------------------------|-------------------|---------------------|---------------------|---------------------|
| U-test                            | Lower bound       |                     | Upper bound         |                     |
| Interval                          | 4                 |                     | 18                  |                     |
| Slope                             | 0.0806            |                     | −0.0756             |                     |
| t-value                           | 1.95              |                     |                     |                     |
| P>t                               | 0.0255            |                     |                     |                     |
| Panel B: Other Robustness Checks  |                   |                     |                     |                     |
|                                   | 1                 | 2                   | 3                   | 4                   |
| Symbol                            | Cubic Regression  | GW2                 | GW3                 | Extended Controls   |
| Bsize                             | 0.167<br>(0.93)   | 0.144**<br>(2.32)   | 0.036**<br>(2.19)   | 0.114**<br>(2.36)   |
| Bsize2                            | −0.010<br>(−0.57) | −0.006**<br>(−2.07) | −0.002**<br>(−2.28) | −0.005**<br>(−2.15) |
| Bsize3                            | 0.000<br>(0.26)   |                     |                     |                     |
| Lev                               |                   |                     |                     | 0.432***<br>(3.94)  |
| GDP                               |                   |                     |                     | −0.141<br>(−1.49)   |
| Constant                          | −0.929<br>(−1.17) | −1.146<br>(−1.48)   | −0.136<br>(−0.66)   | 0.635<br>(0.56)     |
| Control                           | Yes               | Yes                 | Yes                 | Yes                 |
| Year                              | Yes               | Yes                 | Yes                 | Yes                 |
| Firm                              | Yes               | Yes                 | Yes                 | Yes                 |
| Observations                      | 12,999            | 12,904              | 12,999              | 12,986              |
| R-squared                         | 0.653             | 0.415               | 0.394               | 0.654               |

Robust t-statistics in parentheses.

\*\*\*  $p < 0.01$ , \*\*  $p < 0.05$ , \*  $p < 0.1$ .

<https://doi.org/10.1371/journal.pone.0335803.t003>



normalize ESG disclosure and ESG performance within each industry–year cell and construct an industry-adjusted measure [134], *GW2*. Second, following Chen et al. (2025) [135], we assess firms’ greenwashing behavior by comparing the intensity of ESG rhetoric in the ESG/CSR/ sustainability reports with their actual performance. To measure ESG rhetoric, drawing on Huang et al. (2025) [136], we compile a list of ESG-related keywords (see the supplementary materials in [S2 File](#)) and calculate their frequency in the text. We then define a dummy variable *Oral*, which equals 1 if this frequency is above the contemporaneous industry median and 0 otherwise. To capture actual performance, we define another dummy variable *Actual*, which equals 1 if the firm receives an environmental penalty in that year and 0 otherwise. We then construct the alternative greenwashing indicator *GW3*, which equals 1 when *Oral*=1 and *Actual*=1, and 0 otherwise. The results reported in Columns 2 and 3 of Panel B in [Table 3](#) are consistent with the baseline regression findings.

Fourth, we added provincial gross regional product (*GDP*) to control for regional economic development disparities [39] and leverage (*Lev*) to account for its potential impact on unethical behavior [9]. These additional controls were introduced at this stage to maintain baseline model parsimony. As shown in Panel B, Column 4, results remain consistent.

Finally, we conducted additional checks by altering standard error clustering to address potential cross-cluster correlations [8] and by replacing firm fixed effects with alternative specifications (industry or regional). These results, consistent with baseline findings, are available in Table A5 in [S1 File](#).

## 5.4 Moderating effects

[Table 4](#) presents the regression estimates for the moderating effects of board diversity on the inverted-U relationship between board size and greenwashing. For gender diversity (Column 1), the interaction term *Bsize*×*Female*<sup>2</sup> is negative but insignificant, offering no empirical support for H2. For functional background diversity (Column 2), the coefficient on *Bsize*×*Funback*<sup>2</sup> is significant ( $\beta = -0.008$ ,  $p < 0.10$ ), supporting H3. Its negative sign indicates that the curve becomes steeper, suggesting that the resource provision function outweighs the monitoring function. This dominant effect manifests as a more effective alleviation of legitimacy pressure, ultimately reducing the firm’s motivation for greenwashing [3]. Panel A of [Fig 3](#) plots the predicted curves at the 25th, 50th, and 75th percentiles of functional background diversity, showing that higher functional diversity steepens the inverted-U, reduces the quadratic coefficient, and shifts the turning point leftward.

For nationality diversity (Column 3), the interaction *Bsize*×*Nationality*<sup>2</sup> is highly significant ( $\beta = 0.022$ ,  $p < 0.01$ ), supporting H4. Its positive sign indicates that the curve becomes flatter, suggesting that supervision—rather than resource provision—is the dominant function for foreign directors, making the reduction of greenwashing opportunities their primary path to curbing greenwashing behavior. Panel B shows that higher nationality diversity flattens the curve until it approaches linearity at the 75th percentile, with the turning point shifting rightward and eventually disappearing.

For age diversity (Column 4), the coefficient on *Bsize*×*Age*<sup>2</sup> is positive and significant ( $\beta = 0.072$ ,  $p < 0.10$ ), supporting H5. Panel C shows that greater age heterogeneity flattens the inverted-U, enlarges the quadratic term, and shifts the turning point rightward.

Collectively, these findings indicate that demographic and cognitive forms of diversity alter both the magnitude and the location of the non-linear association between board size and greenwashing, albeit in divergent directions depending on the specific diversity dimension.

## 5.5 Test of “critical mass”

Our initial tests found no evidence that gender diversity—measured as the proportion of female directors—moderates the inverted-U relationship between board size and greenwashing. A possible explanation is that proportional measures do not capture the “critical mass” needed for minority directors to exert meaningful influence [137]. Extant research suggests that boards require at least three female directors before observable strategic effects emerge, such as enhanced carbon performance [138] or improved ESG performance [86]. To incorporate this threshold logic, we re-specified gender

**Table 4. Moderating effect regression results.**

|                    | 1                   | 2                  | 3                    | 4                    |
|--------------------|---------------------|--------------------|----------------------|----------------------|
| Symbol             | Model1              | Model2             | Model3               | Model4               |
| Bsize              | 0.044<br>(0.68)     | -0.119<br>(-0.78)  | 0.273***<br>(3.72)   | 0.293**<br>(2.54)    |
| Bsize2             | -0.002<br>(-0.59)   | 0.006<br>(0.83)    | -0.013***<br>(-3.51) | -0.016***<br>(-2.77) |
| Female             | -3.416**<br>(-1.96) |                    |                      |                      |
| Bsize×Female       | 0.622*<br>(1.73)    |                    |                      |                      |
| Bsize×Female2      | -0.030<br>(-1.61)   |                    |                      |                      |
| Funback            |                     | -0.695<br>(-1.53)  |                      |                      |
| Bsize×Funback      |                     | 0.156*<br>(1.73)   |                      |                      |
| Bsize×Funback2     |                     | -0.008*<br>(-1.72) |                      |                      |
| Nationality        |                     |                    | 2.447***<br>(2.96)   |                      |
| Bsize×Nationality  |                     |                    | -0.473***<br>(-2.85) |                      |
| Bsize×Nationality2 |                     |                    | 0.022***<br>(2.70)   |                      |
| Age                |                     |                    |                      | 4.918<br>(1.25)      |
| Bsize×Age          |                     |                    |                      | -1.219<br>(-1.56)    |
| Bsize×Age2         |                     |                    |                      | 0.072*<br>(1.91)     |
| Constant           | -0.307<br>(-0.49)   | 0.241<br>(0.26)    | -1.576**<br>(-2.43)  | -1.541*<br>(-1.88)   |
| Control            | Yes                 | Yes                | Yes                  | Yes                  |
| Year               | Yes                 | Yes                | Yes                  | Yes                  |
| Firm               | Yes                 | Yes                | Yes                  | Yes                  |
| Observations       | 12,999              | 12,999             | 12,999               | 12,999               |
| R-squared          | 0.654               | 0.653              | 0.653                | 0.653                |

Robust t-statistics in parentheses.

\*\*\* p<0.01, \*\* p<0.05, \* p<0.1.

<https://doi.org/10.1371/journal.pone.0335803.t004>

diversity using three dummy variables [139,140]: *Female\_one*, *Female\_two*, and *Female\_three*, equal to 1 when a board has at least 1, 2, or 3 female directors, respectively. Each dummy was interacted with both the linear and quadratic terms of board size, yielding six interaction terms *Bsize×Female\_one*, *Bsize×Female\_two*, *Bsize×Female\_three* and *Bsize×Female\_one*<sup>2</sup>, *Bsize×Female\_two*<sup>2</sup>, *Bsize×Female\_three*<sup>2</sup>. Separate regressions were then estimated, and the results appear in Table 5. Columns 2 and 3 show that the coefficients on *Bsize×Female\_two*<sup>2</sup> and *Bsize×Female\_three*<sup>2</sup> are significantly

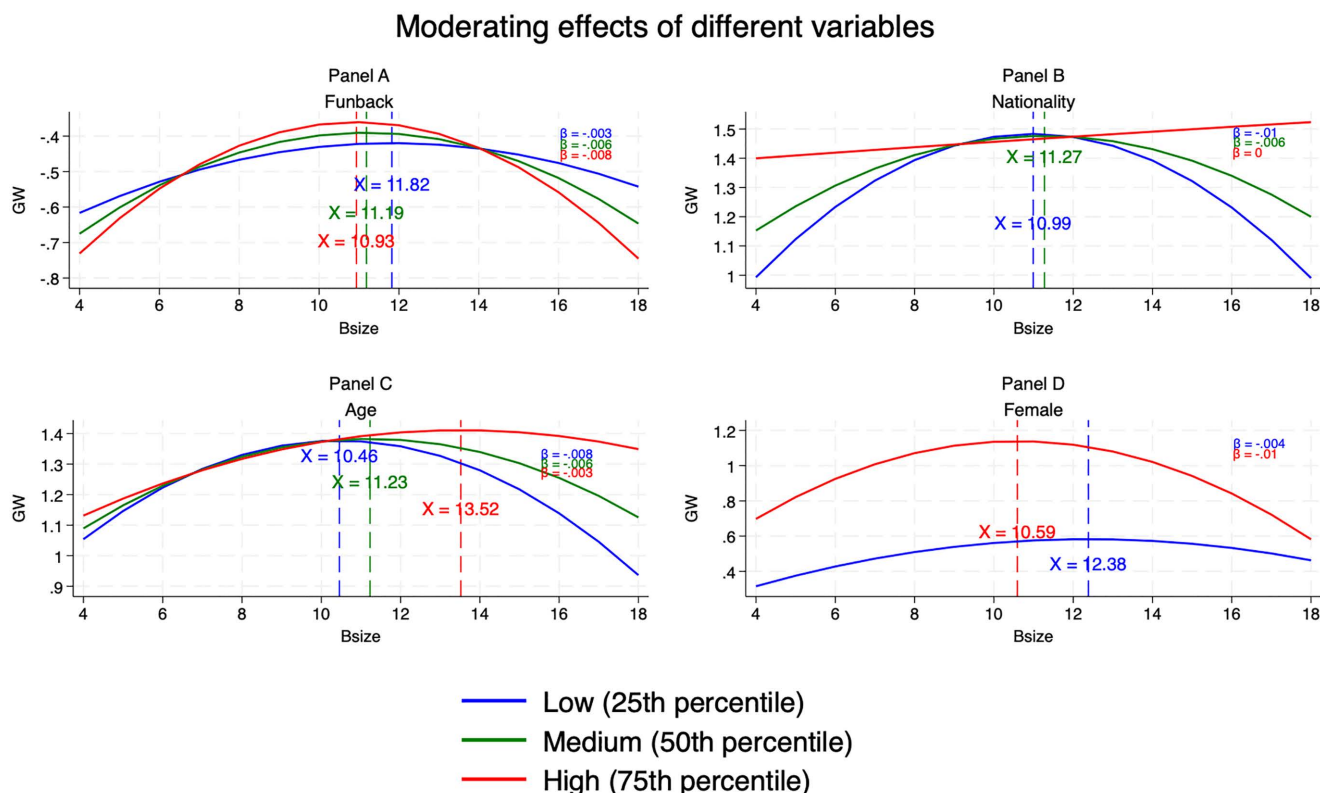

**Fig 3. Moderating effects of board diversity dimensions: function, nationality, age, and gender.** Note: In Panel D, “Low” indicates Female < 2, and “High” indicates Female ≥ 2.

<https://doi.org/10.1371/journal.pone.0335803.g003>

negative, indicating that boards with at least two female directors exceed the critical-mass threshold and meaningfully moderate the inverted-U. Panel D of Fig 3 illustrates this effect: the quadratic term becomes more negative (from  $-0.004$  to  $-0.01$ ), the curve steepens, and the turning point shifts leftward (from 10.59 to 12.38). These findings provide partial support for H2. Similarly, as with functional background diversity, the negative coefficient indicates that the resource provision function of female directors outweighs their monitoring function and thus becomes the dominant role. As board size increases, this manifests in a more rapid alleviation of legitimacy pressure.

## 6 Discussion and conclusion

### 6.1 Research conclusions

This study examined why board size is neither an unqualified problem nor a universal remedy for greenwashing. Integrating FTT with agency and resource dependence perspectives, we theorized and confirmed an inverted-U relationship: greenwashing is lowest when boards are very small or very large and peaks at moderate sizes. Small boards tighten monitoring and restrict opportunities for symbolic disclosure, whereas large boards provide sufficient legitimacy-building resources to ease external pressure to greenwash. At intermediate sizes, opportunity and pressure intersect, generating the highest propensity for symbolic ESG communication. This non-linear pattern refines dominant linear accounts in governance research and shows how FTT can help explain non-linear effects in sustainability outcomes. We further investigated how board diversity conditions this relationship by examining how different diversity dimensions shift the balance between opportunity and pressure.

**Table 5. Moderating effect of female critical mass.**

|                     | (1)                | (2)                | (3)                 |
|---------------------|--------------------|--------------------|---------------------|
| Symbol              | Model1             | Model2             | Model3              |
| Bsize               | 0.047<br>(0.61)    | 0.094*<br>(1.79)   | 0.111**<br>(2.22)   |
| Bsize2              | -0.002<br>(-0.49)  | -0.004<br>(-1.48)  | -0.005**<br>(-2.07) |
| Female_one          | -0.692*<br>(-1.67) |                    |                     |
| Bsize×Female_one    | 0.120<br>(1.48)    |                    |                     |
| Bsize×Female_one2   | -0.005<br>(-1.42)  |                    |                     |
| Female_two          |                    | -0.600<br>(-1.43)  |                     |
| Bsize×Female_two    |                    | 0.121<br>(1.51)    |                     |
| Bsiz×Female_two2    |                    | -0.006*<br>(-1.70) |                     |
| Female_three        |                    |                    | -1.342*<br>(-1.96)  |
| Bsize×Female_three  |                    |                    | 0.243*<br>(1.85)    |
| Bsize×Female_three2 |                    |                    | -0.010*<br>(-1.71)  |
| Constant            | -0.340<br>(-0.52)  | -0.635<br>(-1.07)  | -0.731<br>(-1.25)   |
| Control             | Yes                | Yes                | Yes                 |
| Year                | Yes                | Yes                | Yes                 |
| Firm                | Yes                | Yes                | Yes                 |
| Observations        | 12,999             | 12,999             | 12,999              |
| R-squared           | 0.654              | 0.653              | 0.653               |

Robust t-statistics in parentheses.

\*\*\*  $p < 0.01$ , \*\*  $p < 0.05$ , \*  $p < 0.1$ .

<https://doi.org/10.1371/journal.pone.0335803.t005>

For gender diversity, we find no significant moderating effect when it is measured as a continuous proportion. Once a critical mass is considered, however, the presence of at least two female directors clearly steepens the inverted-U. This suggests that a relatively low threshold is sufficient for women to exert visible influence in Chinese listed firms and that the often-cited Western benchmark of three female directors may not be universal [141]. Beyond this threshold, our evidence indicates that female directors primarily operate through a resource channel. Because greenwashing is fundamentally a strategy of legitimacy management rather than a purely agency-driven problem [3], external legitimacy resources—such as stakeholder networks, symbolic capital, and credible signals of social commitment [142]—are especially effective in addressing the institutional pressures that give rise to greenwashing. This mechanism is particularly salient in China, where legitimacy pressures from social media and international investors have intensified [51,143], rendering such resources more consequential than marginal improvements in monitoring alone [144].

Functional background diversity produces a similar steepening effect. Heterogeneous functional expertise equips boards with problem-solving capabilities and ESG-relevant knowledge that can improve substantive ESG performance and thereby accelerate the decline in legitimacy pressure as boards grow. In our setting, this performance-enhancing role appears to dominate the supervisory benefits of cognitive diversity, which operate more indirectly by preventing poor decisions *ex post*. This aligns with the view that domain-specific knowledge and implementation capacity can reduce reliance on symbolic disclosure more quickly than incremental monitoring improvements [90].

By contrast, nationality diversity tends to flatten the inverted-U. Foreign directors' independence from local relationship networks and *guanxi*-based ties enhances supervisory effectiveness and reduces opportunities for greenwashing [145]. Yet their ability to supply legitimacy resources is constrained by institutional distance and limited familiarity with local regulatory frameworks, stakeholder expectations, and culturally embedded ESG priorities [146]. Nationality diversity therefore operates mainly through a supervision channel that constrains opportunistic disclosure, rather than through a strong resource channel that rapidly alleviates pressure.

Age diversity displays a more hybrid pattern. Intergenerational heterogeneity can broaden cognitive perspectives and mitigate groupthink [64], strengthening oversight and reducing opportunities for greenwashing. At the same time, age-related value differences and communication frictions may slow consensus-building on ESG strategies and delay performance improvements [147]. This combination dampens both the erosion of opportunity and the relief of pressure, flattening the curve.

Taken together, our findings show that moderately sized boards are most prone to greenwashing and that different diversity dimensions systematically condition this non-linearity. Gender and functional diversity sharpen the inverted-U by enhancing legitimacy-related resources, while nationality diversity primarily tightens supervision and flattens the curve. Age diversity exhibits a hybrid pattern, simultaneously strengthening oversight and slowing pressure relief. These patterns are especially salient in China's institutional environment, where ESG disclosure is expanding rapidly under evolving regulation, capital markets remain relatively nascent, and firms face complex legitimacy pressures from different stakeholders. In such a setting, boards must continually rebalance opportunity and pressure in response to shifting expectations, rendering both board size and board composition critical levers in shaping greenwashing behavior.

## 6.2 Theoretical implications

This study advances corporate governance theory through three interconnected contributions. First and most fundamentally, we demonstrate how board structural and compositional characteristics interact in nonlinear, directionally opposite ways to shape greenwashing. By transplanting FTT from its traditional fraud detection context to ESG disclosure, we develop and empirically confirm a novel configurational framework: board size exhibits an inverted-U relationship with greenwashing, but this base nonlinearity is systematically reshaped—steepened or flattened—by theoretically distinct diversity dimensions operating through resource-based versus supervision-based mechanisms. This integrated “nonlinear base + dual-mechanism moderation” insight moves beyond traditional linear agency models and isolated diversity effects, revealing board governance as a complex adaptive system where structural and compositional levers function interdependently rather than additively.

Second, our fine-grained decomposition of four diversity attributes challenges the prevailing “surface-level versus deep-level” binary in governance research. Rather than treating diversity as monolithic, we theorize and demonstrate how each dimension—gender, functional background, nationality and age—recalibrates the opportunity–pressure calculus through distinct supervision and resource channels. This attribute-specific approach explains why diversity effects on corporate misconduct are contingent and context-dependent, providing a mechanism-based explanation for the mixed findings that have plagued prior literature.

Third, our finding that a two-woman threshold constitutes critical mass in Chinese boardrooms challenges the Western “three-director” benchmark established in developed markets, underscoring how institutional context modulates the translation of diversity into governance outcomes. This cross-institutional insight highlights the contextual malleability of governance mechanisms and cautions against universal prescriptions in diversity regulation.



Collectively, these contributions recast board structure and composition as interdependent, nonlinear determinants of ESG greenwashing, offering a contingency-based framework that integrates agency theory, resource dependence, and FTT perspectives.

### 6.3 Managerial implications

The findings of this study offer clear guidance for sustainable governance: by strategically designing corporate board structures, organizations can significantly reduce the risk of greenwashing. We propose two evidence-based governance recommendations for enterprises, emphasizing that optimizing board composition and diversity strategies can not only curb misleading sustainability claims but also strengthen genuine ESG governance.

First, optimize board size strategically. Our results demonstrate an inverted U-shaped relationship between board size and greenwashing propensity, with medium-sized boards (10–13 members) exhibiting the highest risk. Organizations should evaluate whether their current board composition falls within this high-risk range and consider either downsizing to enhance accountability or expanding to strengthen legitimacy resources [59]. Although optimal size may vary across organizational contexts, the fundamental objective remains consistent: ensuring boards possess sufficient capacity to either rigorously scrutinize ESG claims or actively promote authentic sustainability performance [8].

Second, implement targeted diversity management aligned with board size. As illustrated in Fig 4, when board expansion is necessary, for smaller boards (fewer than 10 members), giving priority to appointing directors with diverse age and nationality backgrounds can effectively delay the rise of greenwashing tendencies. For larger boards (more than 13 members), priority should be given to increasing the number of female directors (to at least two) and directors with diverse functional backgrounds, in order to accelerate the suppression of greenwashing behavior. Similarly, when downsizing the board, smaller boards should retain female directors (ensuring at least two) and those with diverse functional backgrounds to facilitate a faster decline in greenwashing. In contrast, larger boards should retain directors with age and nationality diversity to slow the resurgence of greenwashing risks. This refined approach to diversity management can optimize the governance effect of board size on greenwashing [62].

In conclusion, firms should avoid falling within this high-risk range when designing board size. If this range is unavoidable, they should establish robust governance balancing mechanisms to mitigate potential risks [132].

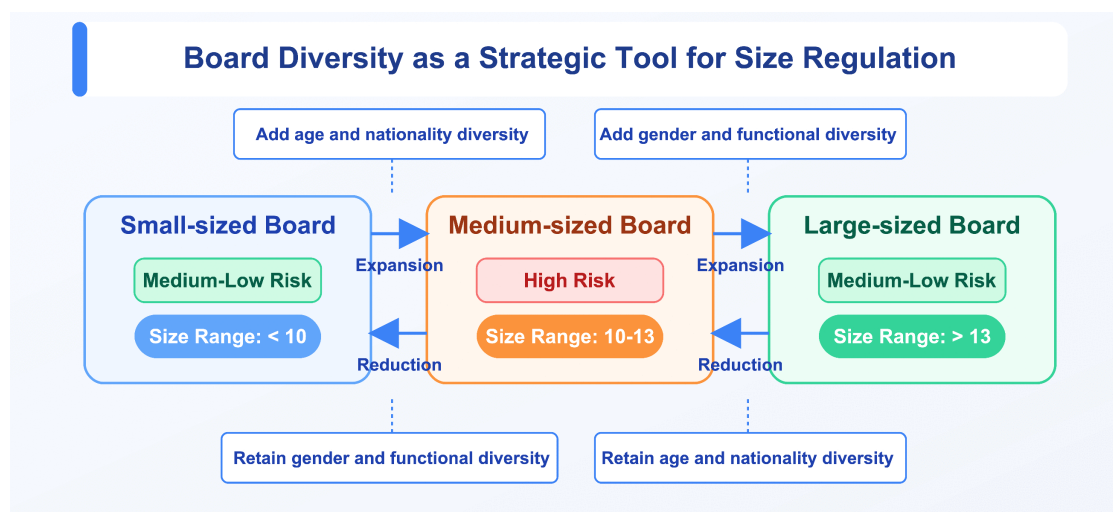

**Fig 4. Strategic diversity configurations for managing greenwashing across board sizes.**

<https://doi.org/10.1371/journal.pone.0335803.g004>

## 6.4 Limitations and future research

This study has several limitations that point toward promising avenues for future research. First, it focuses solely on Chinese listed companies, limiting generalizability to other institutional contexts. Future cross-national comparative studies could test whether the inverted-U mechanism identified here operates similarly across different regulatory environments, and whether the relative dominance of resource-based versus supervision-based mechanisms varies with institutional factors such as stakeholder activism and cultural orientations toward corporate social responsibility.

Second, our analysis treats the board as homogeneous and does not differentiate among executive, non-executive, and independent directors. These roles vary in responsibilities and incentives, which may shape their contributions to opportunity reduction and pressure alleviation differently. Independent directors may primarily enhance monitoring capacity, while executive directors may be better positioned to mobilize legitimacy resources. Future work using director-level data could examine how the balance between supervision-based and resource-based mechanisms shifts across director categories at different board sizes.

Third, our measurement of greenwashing has several limitations. Our baseline proxy—defined as the difference between normalized ESG disclosure and ESG performance—may be noisy due to measurement error, heterogeneity in rating methodologies, and unobserved firm- and industry-level characteristics. Although we address this concern through robustness checks (e.g., a text-based “talk–walk” measure, GW3), this approach relies on keyword frequencies and therefore cannot distinguish vague, symbolic language from specific, verifiable claims. Future research could improve measurement precision by using natural language processing to classify sentence-level specificity or by constructing indicators that capture the relative weight of quantitative metrics versus qualitative statements in ESG narratives.

Fourth, despite using fixed effects, GMM, and PSM to address endogeneity, residual concerns remain from unobserved time-varying factors. Future research could employ natural experiments—such as regulatory changes mandating board size or diversity thresholds—to strengthen causal inference and test whether the mechanisms underlying the inverted-U relationship align with our theoretical predictions.

Finally, although this study distinguishes between resource-based and supervision-based mechanisms in the moderating roles of gender, functional background, and nationality diversity, it does not make a similar distinction for age diversity, leaving important scope for future research. Future studies could further examine whether the moderating effect of age diversity on the inverted U-shaped relationship between board size and greenwashing is primarily driven by resource-based mechanisms or by supervision-based mechanisms. In addition, future research could investigate the interaction effects among different diversity dimensions to identify board configurations that are more effective in simultaneously constraining opportunity and alleviating pressure.

## Supporting information

### S1 Data. Data.

(XLSX)

### S1 Fig. Graphical abstract.

(PNG)

### S1 File. Appendix.

(DOCX)

### S2 File. Supplementary materials.

(DOCX)

## Author contributions

**Conceptualization:** Yong-Sik Hwang.

**Data curation:** Jingzhao Yu.

**Formal analysis:** Jingzhao Yu.

**Investigation:** Jingzhao Yu, Yong-Sik Hwang.

**Methodology:** Jingzhao Yu.

**Project administration:** Yong-Sik Hwang.

**Resources:** Jingzhao Yu, Yong-Sik Hwang.

**Software:** Jingzhao Yu.

**Supervision:** Yong-Sik Hwang.

**Validation:** Jingzhao Yu, Yong-Sik Hwang.

**Writing – original draft:** Jingzhao Yu.

**Writing – review & editing:** Yong-Sik Hwang.

## References

1. EY. How can investors balance short-term demands with long-term sustainability?. 2024. <https://www.ey.com/content/dam/ey-unified-site/ey-com/en-gl/insights/climate-change-sustainability-services/documents/ey-gl-institutional-investor-survey-12-2024.pdf>
2. China Association for Public Companies. Analysis Report on the Sustainability Information Disclosure of Listed Companies in 2025. 2025. [https://www.capco.org.cn/xhdt/xhyw/202508/20250814/j\\_2025081416113500017551592156222821.html](https://www.capco.org.cn/xhdt/xhyw/202508/20250814/j_2025081416113500017551592156222821.html)
3. Lee MT, Raschke RL. Stakeholder legitimacy in firm greening and financial performance: What about greenwashing temptations?\*. *Journal of Business Research*. 2023;155:113393. <https://doi.org/10.1016/j.jbusres.2022.113393>
4. Zhang D. Does green finance really inhibit extreme hypocritical ESG risk? A greenwashing perspective exploration. *Energy Economics*. 2023;121:106688. <https://doi.org/10.1016/j.eneco.2023.106688>
5. Huang Y, Xiong N, Liu C. Renewable energy technology innovation and ESG greenwashing: Evidence from supervised machine learning methods using patent text. *J Environ Manage*. 2024;370:122833. <https://doi.org/10.1016/j.jenvman.2024.122833> PMID: 39388814
6. Lu Z, Lin Y, Li Y. Does corporate engagement in digital transformation influence greenwashing? Evidence from China. *Finance Research Letters*. 2023;58:104558.
7. Xia F, Chen J, Yang X, Li X, Zhang B. Financial constraints and corporate greenwashing strategies in China. *Corp Soc Resp Env Ma*. 2023;30(4):1770–81.
8. Chen P, Dagestani AA. Greenwashing behavior and firm value - from the perspective of board characteristics. *Corp Soc Resp Env Ma*. 2023;30(5):2330–43.
9. Eliwa Y, Aboud A, Saleh A. Board gender diversity and ESG decoupling: Does religiosity matter?. *Bus Strat Env*. 2023;32(7):4046–67. <https://doi.org/10.1002/bse.3353>
10. Yu EP, Luu BV, Chen CH. Greenwashing in environmental, social and governance disclosures. *Research in International Business and Finance*. 2020;52:101192.
11. Pfeffer J. Size and composition of corporate boards of directors: the organization and its environment. *Adm Sci Q*. 1972;17(2):218–28.
12. Hussain N, Rigoni U, Orij RP. Corporate governance and sustainability performance: analysis of triple bottom line performance. *J Bus Ethics*. 2018;149(2).
13. Jensen MC, Meckling WH. Theory of the Firm: Managerial Behavior, Agency Costs, and Ownership Structure. *Rochester Studies in Economics and Policy Issues*. Springer Netherlands. 1979. 163–231. [https://doi.org/10.1007/978-94-009-9257-3\\_8](https://doi.org/10.1007/978-94-009-9257-3_8)
14. Govindan K, Kilic M, Uyar A, Karaman AS. Drivers and value-relevance of CSR performance in the logistics sector: a cross-country firm-level investigation. *Int J Prod Econ*. 2021;231:107835.
15. Keresztúri JL, Berlinger E, Lublóy Á. Environmental policy and stakeholder engagement: incident-based, cross-country analysis of firm-level greenwashing practices. *Corp Soc Responsib Environ Manag*. 2025;32(1):192–211.
16. Gidage M, Bhide S, Bilan Y. Greenwashing in the Indian corporate landscape: an empirical assessment of ESG disclosures of NIFTY 50 companies. *Environ Dev Sustain*. 2024;27(9):21861–85.

17. Fernandez WD. What does board capital really bring to the table?. *Am J Bus.* 2019;34(3/4):134–47.
18. Sepulveda-Nuñez MDDC. Board of directors effect on environmental, social and governance performance in publicly traded non-financial firms. *Corp Gov: Int J Bus Soc.* 2025;25(2):211–28.
19. Endrikat J, de Villiers C, Guenther TW, Guenther EM. Board characteristics and corporate social responsibility: a meta-analytic investigation. *Bus Soc.* 2021;60(8):2099–135.
20. Ghitti M, Gianfrate G, Palma L. The agency of greenwashing. *J Manag Gov.* 2024;28(3):905–41.
21. Hillman AJ, Dalziel T. Boards of directors and firm performance: integrating agency and resource dependence perspectives. *Acad Manage Rev.* 2003;28(3):383–96.
22. de Villiers C, Naiker V, van Staden CJ. The Effect of Board Characteristics on Firm Environmental Performance. *Journal of Management.* 2011;37(6):1636–63. <https://doi.org/10.1177/0149206311411506>
23. Li M, Chen Q. Executive pay gap and corporate ESG greenwashing: evidence from China. *Int Rev Financ Anal.* 2024;95:103375.
24. Liao F, Sun Y, Xu S. Financial report comment letters and greenwashing in environmental, social and governance disclosures: Evidence from China. *Energy Economics.* 2023;127:107122. <https://doi.org/10.1016/j.eneco.2023.107122>
25. Long L, Wang C, Zhang M. Does Social Media Pressure Induce Corporate Hypocrisy? Evidence of ESG Greenwashing from China. *J Bus Ethics.* 2024;197(2):311–38. <https://doi.org/10.1007/s10551-024-05747-3>
26. Ang JS, Hsu C, Tang D, Wu C. The role of social media in corporate governance. *Account Rev.* 2021;96(2):1–32.
27. Zhu F, Fan H, Zheng Z. The disclosure fog: Institutional investors and corporate greenwashing. *Int J Fin Econ.* 2025;ijfe.3096. <https://doi.org/10.1002/ijfe.3096>
28. Padungsaksawasdi C, Treepongkaruna S. Corporate social responsibility, board characteristics, and family business in Thailand. *Corp Soc Responsibility Env.* 2023;31(2):1340–53. <https://doi.org/10.1002/csr.2636>
29. Disli M, Yilmaz MK, Mohamed FFM. Board characteristics and sustainability performance: empirical evidence from emerging markets. *Sustain Account Manag Policy J.* 2022;13(4):929–52.
30. Zhu N, Yang J, Agyemang AO. Unveiling sustainability: tech-infused governance and ESG performance in textile industry. *Bus Ethics Environ Responsib.* 2024;n/a(n/a):beer.12690.
31. Papadopoulou V, Karagiannopoulou S, Sariannidis N, Giannarakis G. The Nonlinear Effect of Board Size and the Moderating Role of Gender Diversity on Corporate Social Responsibility Performance in Europe. *Sustainable Development.* 2025;34(S1):572–90. <https://doi.org/10.1002/sd.70187>
32. Zhang X, Liu F, Fang M. Who is acting unethically? The role of board diversity in corporate social responsibility decoupling. *Corp Soc Responsibility Env.* 2025;:csr.70174. <https://doi.org/10.1002/csr.70174>
33. Szabo S, Webster J. Perceived greenwashing: The effects of green marketing on environmental and product perceptions. *J Bus Ethics.* 2021;171(4):719–39.
34. Gull AA, Hussain N, Akbar Khan S, Nadeem M, Mansour Zalata A. Walking the talk? A corporate governance perspective on corporate social responsibility decoupling. *British Journal of Management.* 2023;34(4):2186–211.
35. Huang DZX. Environmental, social and governance (ESG) activity and firm performance: a review and consolidation. *Accounting & Finance.* 2019;61(1):335–60. <https://doi.org/10.1111/acfi.12569>
36. Dorfleitner G, Utz S. Green, green, it's green they say: a conceptual framework for measuring greenwashing on firm level. *Rev Manag Sci.* 2024;18(12):3463–86.
37. Jiang C, Xu J, Xu Q, Fu W. Can we rest easy under the registration-based IPO reform? Evidence from the Chinese growth enterprise market. *Econ Anal Policy.* 2024;83:990–1006.
38. Li Z, Miao S, Xu L. Digital transformation and environmental, social, and governance greenwashing: evidence from China. *J Environ Manage.* 2024;365:121460.
39. Sun Z, Sun X, Wang W, Wang W. Digital transformation and greenwashing in environmental, social, and governance disclosure: does investor attention matter?. *Business Ethics Env & Resp.* 2025;34(1):81–102.
40. De Novellis G, Pedrazzoli A, Pennetta D, Venturelli V. Greenwashing, greenhushing, and the path to green banking. *Global Finance Journal.* 2025;67:101147. <https://doi.org/10.1016/j.gfj.2025.101147>
41. Kurpierz JR, Smith K. The greenwashing triangle: adapting tools from fraud to improve CSR reporting. *SAMPJ.* 2020;11(6):1075–93. <https://doi.org/10.1108/sampj-10-2018-0272>
42. Cressey DR. Other people's money; a study of the social psychology of embezzlement. Free Press. 1953.
43. Suchman MC. Managing Legitimacy: Strategic and Institutional Approaches. *The Academy of Management Review.* 1995;20(3):571. <https://doi.org/10.2307/258788>
44. Baldini M, Maso LD, Liberatore G, Mazzi F, Terzani S. Role of country- and firm-level determinants in environmental, social, and governance disclosure. *J Bus Ethics.* 2018;150(1):79–98.

45. Berrêdo PD, dos Santos OM, Abdo H, da Silva Macedo MÂ, Losekann LD. Energy transition: assessing oil companies' compliance with their disclosed environmental strategic positioning. *Corp Soc Resp Env Ma*. 2024;31(4):3517–34.
46. Gregory RP. When is greenwashing an easy fix?. *J Sustain Finance Invest*. 2023;13(2):919–42.
47. Wang Z, Hsieh TS, Sarkis J. CSR performance and the readability of CSR reports: too good to be true?. *Corp Soc Responsib Environ Manag*. 2018;25(1):66–79.
48. Zhou J, Lei X. ESG rating uncertainty and corporate financial misconduct. *J Bus Res*. 2025;189:115092.
49. Ghafoor A, Zainudin R, Mahdzan NS. Factors Eliciting Corporate Fraud in Emerging Markets: Case of Firms Subject to Enforcement Actions in Malaysia. *J Bus Ethics*. 2018;160(2):587–608. <https://doi.org/10.1007/s10551-018-3877-3>
50. Huang R, Xie X, Zhou H. Isomorphic behavior of corporate greenwashing. *Chin J Popul Resour Environ*. 2022;20(1):29–39.
51. Ren J, Wu P, Hou L. Social media attention and corporate greenwashing: evidence from China. *Corporate Social Responsibility and Environmental Management*. 2024;31(6):5446–65.
52. Wang J, Chen Y, Wang S. Exploring the relationship between corporate ESG performance and corporate violation: Based on the fraud triangle theory. *Corp Soc Responsib Environ Manag*. 2024;31(6):5606–26.
53. Dicuonzo G, Palmaccio M, Shini M. ESG, governance variables and fintech: an empirical analysis. *Research in International Business and Finance*. 2024;69:102205.
54. Bătae OM, Dragomir VD, Feleagă L. The relationship between environmental, social, and financial performance in the banking sector: a european study. *Journal of Cleaner Production*. 2021;290:125791.
55. Menicucci E, Paolucci G. The influence of italian board characteristics on environmental, social and governance dimensions. *Manage Decis*. 2023;61(10):3082–105.
56. Zhu N, Nagriwum TM, Saeed UF. Advancing ESG performance in MENA economies: Do governance structures and eco-technology matter?. *Corp Soc Responsib Environ Manag*. 2025;32(6):7793–815.
57. Özparlak G, Gürol B. The role of diversity on the environmental performance and transparency. *Environ Dev Sustain*. 2023;27(1):483–507. <https://doi.org/10.1007/s10668-023-04193-x>
58. Agnese P, Cerciello M, Giacomini E, Taddeo S. Environmental, social and governance controversies: the role of european bank boards. *Manage Decis*. 2023;61(12):3739–54.
59. Treepongkaruna S, Kyaw K, Jiraporn P. ESG controversies and corporate governance: Evidence from board size. *Bus Strat Env*. 2024;33(5):4218–32.
60. Osei A, Zhu N, Agyemang AO. Advancing Business Ethical Standards: Unpacking the Synergistic Influence of Governance Structures and CSR Engagement on Corporate Integrity in BRICS Countries. *Corp Soc Responsibility Env*. 2025;32(3):3471–94. <https://doi.org/10.1002/csr.3140>
61. Cabral C, Sasidharan A. Do regulatory mechanisms affect corporate social performance? Evidence from emerging economies. *Journal of Cleaner Production*. 2021;326:129383. <https://doi.org/10.1016/j.jclepro.2021.129383>
62. Kamarudin KA. Nonlinear effects of board size and board independence on corporate sustainability performance: international evidence. *Corp Gov: Int J Bus Soc*. 2025;25(4):860–83.
63. Harjoto MA, Laksmana I, Yang Y wen. Board diversity and corporate investment oversight. *J Bus Res*. 2018;90:40–7.
64. Zhu N, Abdullah, Hashmi MA, Shah MH, Yang J. ESG performance and the cost of debt of Chinese firms: do board idiosyncrasies matter?. *J Knowl Econ*. 2024;:1–31.
65. Adams RB, De Haan J, Terjesen S, Van Ees H. Board diversity: moving the field forward. *Corp Gov: Int Rev*. 2015;23(2):77–82.
66. Harjoto M, Laksmana I, Lee R. Board diversity and corporate social responsibility. *J Bus Ethics*. 2015;132(4).
67. Cucari N, Esposito De Falco S, Orlando B. Diversity of board of directors and environmental social governance: evidence from italian listed companies. *Corp Soc Resp Env Ma*. 2018;25(3):250–66.
68. Wu Z, Gao J, Luo C, Xu H, Shi G. How does boardroom diversity influence the relationship between ESG and firm financial performance?. *International Review of Economics and Finance*. 2024;89:713–30.
69. Mendiratta E, Tasheva S. Gender and racial minorities on corporate boards: How board faultlines and CEO-minority director overlap affect firm performance. *Strategic Management Journal*. 2025;46(3):611–39.
70. Vandebeek A, Voordeckers W, Lambrechts F, Huybrechts J. Board role performance and faultlines in family firms: The moderating role of formal board evaluation. *J Fam Bus Strategy*. 2016;7(4):249–59.
71. Raithel K, van Knippenberg D, Stam D. Team leadership and team cultural diversity: the moderating effects of leader cultural background and leader team tenure. *J Leadersh Organ Stud*. 2021;28(3):261–72.
72. Hernández-Atienza F, Rodríguez-Sanz JA, Tejerina-Gaite F. The pathways of board diversity in european contexts: exploring the influence of director types on firm performance. *Res Int Bus Finance*. 2024;72:102501.
73. Arena C, Garcia-Torea N, Michelon G. The lines that divide: board demographic faultlines and proactive environmental strategy. *Corp Gov: Int Rev*. 2024;32(5):833–55.



74. Calabrese GG, Manello A. Board diversity and performance in a masculine, aged and global supply chain: new empirical evidence. *Corp Gov: Int J Bus Soc*. 2021;21(7):1440–59.
75. He Q, Wang Z, Wang G, Xie J, Chen Z. The dark side of environmental sustainability in projects: unraveling greenwashing behaviors. *Proj Manag J*. 2022;53(4).
76. Haans RFJ, Pieters C, He ZL. Thinking about U: Theorizing and testing U- and inverted U-shaped relationships in strategy research. *Strategic Management Journal*. 2016;37(7):1177–95.
77. Ang SH. Competitive intensity and collaboration: impact on firm growth across technological environments. *Strategic Management Journal*. 2008;29(10):1057–75.
78. Baselga-Pascual L, Trujillo-Ponce A, Vähämaa E, Vähämaa S. Ethical reputation of financial institutions: do board characteristics matter?. *J Bus Ethics*. 2018;148(3):489–510.
79. Sauerwald S, Su W. CEO overconfidence and CSR decoupling. *Corp Gov*. 2019;27(4):283–300.
80. Lange PAMV, Higgins ET. *Handbook of theories of social psychology*. Los Angeles: SAGE. 2012.
81. Gilligan C. In a Different Voice: Women's Conceptions of Self and of Morality. *harvard educational review*. 1977;47(4):481–517. <https://doi.org/10.17763/haer.47.4.g6167429416hg510>
82. Heubeck T. Walking on the gender tightrope: unlocking ESG potential through CEOs' dynamic capabilities and strategic board composition. *Bus Strateg Environ*. 2024;33(3):2020–39.
83. Orazalin N, Baydauletov M. Corporate social responsibility strategy and corporate environmental and social performance: the moderating role of board gender diversity. *Corp Soc Resp Env Ma*. 2020;27(4):1664–76.
84. Liao L, Lin T, Zhang Y. Corporate Board and Corporate Social Responsibility Assurance: Evidence from China. *J Bus Ethics*. 2016;150(1):211–25. <https://doi.org/10.1007/s10551-016-3176-9>
85. Campanella F, Serino L, Crisci A, D'Ambra A. The role of corporate governance in environmental policy disclosure and sustainable development. *Corp Soc Resp Env Ma*. 2021;28(1).
86. Cambrea DR, Paolone F, Cucari N. Advisory or monitoring role in ESG scenario: Which women directors are more influential in the Italian context?. *Bus Strat Env*. 2023;32(7):4299–314. <https://doi.org/10.1002/bse.3366>
87. Wasiuzzaman S, Subramaniam V. Board gender diversity and environmental, social and governance (ESG) disclosure: is it different for developed and developing nations?. *Corp Soc Resp Env Ma*. 2023;30(5).
88. Nicolò G, Andrade-Peña FJ. Does corporate governance influence environmental, social and governance disclosure practices of state-owned enterprises? An international study. *Corp Soc Resp Env Ma*. 2024;31(5):4715–31.
89. Alawadi A, Kakabadse N, Morley M, Khan N. Diversified boards and the achievement of environmental, social, and governance goals. *Business Ethics Env & Resp*. 2023;33(3):331–48. <https://doi.org/10.1111/beer.12606>
90. Liu EX, Zhou S, Mi J. Diversity breeds strength: CEO functional experience diversity and corporate ESG performance. *Bus Strat Env*. 2025;bse.4227.
91. Zhang Y, Zhang X. Top management team functional diversity and ESG performance. *Finance Research Letters*. 2024;63:105362.
92. Gray S, Nowland J. The diversity of expertise on corporate boards in Australia. *Accounting & Finance*. 2015;57(2):429–63. <https://doi.org/10.1111/acfi.12146>
93. Fleitas-Castillo GC, Peña-Martel D, Santana-Martín DJ, Santana-Negrín Y. Board gender diversity and greenwashing in Europe. *Corp Soc Responsib Environ Manag*. 2025;32(3):4315–27.
94. Birindelli G, Chiappini H, Jalal RNUD. Greenwashing, bank financial performance and the moderating role of gender diversity. *Res Int Bus Finance*. 2024;69:102235.
95. Ashraf BN, Qian N. The Impact of Board Internationalization on Real Earnings Management: Evidence From China. *Sage Open*. 2021;11(3). <https://doi.org/10.1177/21582440211032640>
96. Wu H, Sun Q, Zhang Z, Wang D. Does Board Internationalization Affect Corporate ESG Performance? Evidence from Chinese A-Share-Listed Companies. *Sustainability*. 2024;16(23):10738. <https://doi.org/10.3390/su162310738>
97. Nicolò G, Zanellato G, Esposito B, Tiron-Tudor A. Cultural dimensions and sustainability disclosure in the banking sector: Insights from a qualitative comparative analysis approach. *Bus Strat Env*. 2024;33(8):8086–101. <https://doi.org/10.1002/bse.3911>
98. Estélyi KS, Nisar TM. Diverse boards: why do firms get foreign nationals on their boards?. *J Corp Finance*. 2016;39:174–92.
99. Ullah F, Jiang P, Ntim CG, Shahab Y, Jiang X. Female Directors' Foreign Experience and Environmental and Sustainable Performance\*. *Asia-Pac J of Fin Stud*. 2022;51(2):169–93. <https://doi.org/10.1111/ajfs.12369>
100. Liu Y, Zhang F, Zhang H. CEO foreign experience and corporate environmental, social, and governance (ESG) performance. *Bus Strat Env*. 2023;33(4):3331–55. <https://doi.org/10.1002/bse.3647>
101. Ellili NOD. Impact of corporate governance on environmental, social, and governance disclosure: any difference between financial and non-financial companies?. *Corp Soc Resp Env Ma*. 2023;30(2):858–73.

102. Fernandez WD, Thams Y. Board diversity and stakeholder management: the moderating impact of boards' learning environment. *Learn Organ.* 2019;26(2).
103. Harjoto MA, Laksmana I, Yang Y wen. Board nationality and educational background diversity and corporate social performance. *Corp Gov-Int J Bus Soc.* 2019;19(2).
104. Mardini GH, Lahyani FE. Impact of foreign directors on carbon emissions performance and disclosure: empirical evidence from France. *Sustain Account Manag Policy J.* 2021;13(1).
105. Miletkov M, Poulsen A, Wintoki MB. Foreign independent directors and the quality of legal institutions. *J Int Bus Stud.* 2017;48(2).
106. Kazim I, Wang F, Zhang X. Unlocking the link: foreign-experienced board of directors and environmental violations in China. *Finance Research Letters.* 2024;60:104912.
107. Goergen M, Limbach P, Scholz M. Mind the gap: the age dissimilarity between the chair and the CEO. *J Corp Finance.* 2015;35.
108. Beji R, Yousfi O, Loukil N, Omri A. Board Diversity and Corporate Social Responsibility: Empirical Evidence from France. *J Bus Ethics.* 2020;173(1):133–55. <https://doi.org/10.1007/s10551-020-04522-4>
109. Luksyte A, Avery DR, Parker SK, Wang Y (Lena), Johnson LU, Crepeau L. Age diversity in teams: examining the impact of the least agreeable member. *J Organ Behav.* 2022;43(3):546–65.
110. Hafsi T, Turgut G. Boardroom diversity and its effect on social performance: conceptualization and empirical evidence. *J Bus Ethics.* 2013;112(3):463–79.
111. Janahi M, Millo Y, Voulgaris G. Age diversity and the monitoring role of corporate boards: evidence from banks. *Hum Relat.* 2023;76(10):1599–633.
112. Becker KL, Richards MB, Stollings J. Better together? Examining benefits and tensions of generational diversity and team performance. *J Inter-generational Relatsh.* 2022;20(4):442–63.
113. Agarwala N, Pareek R, Sahu TN. Do firm attributes impact CSR participation? Evidence from a developing economy. *Int J Emerg Mark.* 2023;19(12):4526–42.
114. Deng M, Tang H, Luo W. Can the green experience of CEO improve ESG performance in heavy polluting companies? Evidence from China. *Manage Decis Econ.* 2024;45(4):2373–92.
115. Jin X, Wu Y. How does digital transformation affect the ESG performance of Chinese manufacturing state-owned enterprises?—Based on the mediating mechanism of dynamic capabilities and the moderating mechanism of the institutional environment. *PLoS One.* 2024;19(5):e0301864. <https://doi.org/10.1371/journal.pone.0301864> PMID: 38743669
116. Wang Y, Hu F, Wang Y. Analyst coverage and greenwashing: Evidence from Chinese A-Share listed corporations. *International Review of Economics & Finance.* 2024;94:103423. <https://doi.org/10.1016/j.iref.2024.103423>
117. Raimo N, Caragnano A, Zito M, Vitolla F, Mariani M. Extending the benefits of ESG disclosure: The effect on the cost of debt financing. *Corp Soc Responsibility Env.* 2021;28(4):1412–21. <https://doi.org/10.1002/csr.2134>
118. Tian L, Niu J. Mitigating greenwashing in listed companies: a comprehensive study on strengthening integrity in ESG disclosure and governance. *Pol J Environ Stud.* 2024.
119. Zhang W, Qin C, Zhang W. Top management team characteristics, technological innovation and firm's greenwashing: Evidence from China's heavy-polluting industries. *Technological Forecasting and Social Change.* 2023;191:122522. <https://doi.org/10.1016/j.techfore.2023.122522>
120. Zheng H, Zhang J. The power of crowds: the effect of online platform interactions on greenwashing. *Corp Soc Responsib Environ Manag.* 2024;31(6):6481–503.
121. Oyewo B. Corporate governance and carbon emissions performance: international evidence on curvilinear relationships. *J Environ Manage.* 2023;334:117474.
122. Zahid RMA, Khan MK, Maqsood US, Nazir M. Environmental, social, and governance performance analysis of financially constrained firms: Does executives' managerial ability make a difference?. *Manage Decis Econ.* 2024;45(5):2751–66. <https://doi.org/10.1002/mde.4161>
123. Sigalas C. Resource allocation choices in asset-intensive industries. *European Management Review.* 2024. <https://doi.org/10.1111/emre.12697>
124. Cai C, Geng Y, Yang F. Senior executive characteristics: Impact on ESG practices and corporate valuation relationship. *PLoS One.* 2024;19(7):e0303081. <https://doi.org/10.1371/journal.pone.0303081> PMID: 38990983
125. Orazalin N. Do board sustainability committees contribute to corporate environmental and social performance? The mediating role of corporate social responsibility strategy. *Bus Strat Env.* 2019;29(1):140–53. <https://doi.org/10.1002/bse.2354>
126. Zhang D. Are firms motivated to greenwash by financial constraints? Evidence from global firms' data. *Financ Manag Account.* 2022;33(3):459–79. <https://doi.org/10.1111/jifm.12153>
127. Deng B, Peng Z, Albitar K, Ji L. Top management team stability and ESG greenwashing: Evidence from China. *Bus Strat Env.* 2024;34(1):450–67. <https://doi.org/10.1002/bse.3998>
128. Ilboudo TAS, Argilés-Bosch JM, Costa JA. Corporate social responsibility and labor tax avoidance: evidence from Spain. *Eur Manag Rev.* 2025;22(2):379–96.
129. Hausman JA. Specification Tests in Econometrics. *Econometrica.* 1978;46(6):1251. <https://doi.org/10.2307/1913827>

130. Blundell R, Bond S. Initial conditions and moment restrictions in dynamic panel data models. *Journal of Econometrics*. 1998;87(1):115–43. [https://doi.org/10.1016/s0304-4076\(98\)00009-8](https://doi.org/10.1016/s0304-4076(98)00009-8)
131. Shen J, Peng D, Zhou Y. Government-led CSR effort, innovation, and firm value: evidence from a quasi-natural experiment in China. *Research in International Business and Finance*. 2025;77:102923. <https://doi.org/10.1016/j.ribaf.2025.102923>
132. Konadu R, Ahinful GS, Boakye DJ, Elbardan H. Board gender diversity, environmental innovation and corporate carbon emissions. *Technological Forecasting and Social Change*. 2022;174:121279. <https://doi.org/10.1016/j.techfore.2021.121279>
133. Xia M, Zhu B, Cai HH. Does duration of team governance decrease corporate carbon emission intensity. *Corporate Social Responsibility and Environmental Management*. 2023;30(3):1363–88.
134. Zhang D. Green financial system regulation shock and greenwashing behaviors: Evidence from Chinese firms. *Energy Economics*. 2022;111:106064. <https://doi.org/10.1016/j.eneco.2022.106064>
135. Chen Y, Liu D, He H, Li L. Peer effects of ESG greenwashing within board networks. *International Review of Financial Analysis*. 2025;106:104540.
136. Huang Q, Zhang Y, Li X, Mu X, Wang M. Unmasking isomorphic behaviors in corporate sustainability: evidence from ESG disclosure and practices in emerging markets. *Corp Soc Responsib Environ Manag*. 2025;32(4):4690–725.
137. Kanter RM. Some effects of proportions on group life: skewed sex ratios and responses to token women. *Am J Sociol*. 1977;82(5):965–90.
138. Kyaw K, Treepongkaruna S, Jiraporn P. Board gender diversity and environmental emissions. *Bus Strat Env*. 2022;31(7):2871–81. <https://doi.org/10.1002/bse.3052>
139. Khatri I. Board gender diversity and sustainability performance: Nordic evidence. *Corp Soc Responsibility Env*. 2022;30(3):1495–507. <https://doi.org/10.1002/csr.2432>
140. Oyewo B, Taurigana V, Tingbani I. Microplastics in aquatic bodies: Assessing the role of governance mechanisms in industrial wastewater management. *J Environ Manage*. 2024;349:119563.
141. Torchia M, Calabrò A, Huse M. Women Directors on Corporate Boards: From Tokenism to Critical Mass. *J Bus Ethics*. 2011;102(2):299–317. <https://doi.org/10.1007/s10551-011-0815-z>
142. Temiz H, Acar M. Board gender diversity and corporate social responsibility (CSR) disclosure in different disclosure environments. *Corp Soc Resp Env Ma*. 2023;30(5):2247–64.
143. Tian L, Song X, Du M, Xu B. The disciplinary impact of capital market internationalization on corporate ESG greenwashing: a study of a-shares' inclusion in the MSCI index. *International Review of Financial Analysis*. 2025;103:104202.
144. Yasser QR, Al Mamun A, Ahmed I. Corporate social responsibility and gender diversity: insights from Asia pacific. *Corp Soc Responsib Environ Manag*. 2017;24(3):210–21.
145. Du X, Jian W, Lai S. Do Foreign Directors Mitigate Earnings Management? Evidence From China. *The International Journal of Accounting*. 2017;52(2):142–77. <https://doi.org/10.1016/j.intacc.2017.04.002>
146. Alawadi A, Kakabadse N, Khan N, Bodolica V. Institutional context matters: board diversity and ESG outcomes in the UAE. *Corp Gov: Int J Bus Soc*. 2024.
147. Yoo S, Lee J, Lee Y. Entrepreneurial team conflict and cohesion: meta-structural equation modeling. *Entrep Res J*. 2024;14(1):121–47.
